# Supplementary material
Source: MDPI journal article supplement (https://www.mdpi.com/2311-5629/7/2/41)
Supplement: s1 [file s1]

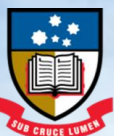

THE UNIVERSITY  
of ADELAIDE

**Professor Dusan Losic**

**Director ARC Graphene Research Hub**

**Leader Nano Research Group**

School of Chemical Engineering and Advanced Materials

THE UNIVERSITY OF ADELAIDE

North Engineering Building

Adelaide 5005, SA, AUSTRALIA

Phone: + 61 8 8313 4648

Email: [dusan.losic@adelaide.edu.au](mailto:dusan.losic@adelaide.edu.au)

<http://chemeng.adelaide.edu.au/losic-group/>

<https://ecms.adelaide.edu.au/graphene-research-hub/>

2D Materials

Graphene

Characterization

Life Impact

**Ms. Doris Yang,**  
[C] Journal of Carbon Research (MDPI)

24<sup>th</sup> April 2021

**Dear Ms. Doris Yang,**

We would like to thank you for your email on 23<sup>th</sup> April 2021, together with the comments from the reviewer on our revised manuscript (**carbon-1177630**) entitled '*Thermal Gravimetric Analysis (TGA) of Graphene Materials: Effect of Particle Size of Graphene, Graphene oxide and Graphite on Thermal Parameters*' as a full-length article submitted to *Journal of Carbon Research*.

Please find below our responses to this Reviewer comments.

Finally, thank you again to the Editorial team for handling our manuscript so expeditiously and for its publication in *Journal of Carbon Research*.

Sincerely yours

**Prof. Dusan Losic**

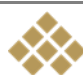

GROUP OF EIGHT  
M E M B E R

## Authors' Response to Reviewer(s)' Comments (Manuscript ID: carbon-1177630)

### Reviewer#1 comments

After seeing the modifications made, I think some items were improved from the previous review, but there are still a lot of uncertainties regarding the particle size. Since this is a major factor they are basing their particle ranges on, I think it requires further examination. I still find Table 1 to be more confusing than useful and I think the authors should reconsider their presentation of the data they have collected. In addition, all Supplementary Information data should have error bars, especially in the case of particle measurements.

#### *Authors' response:*

*To measure particle size of graphene materials in this paper we used combination of two most common and recommended methods. One is using SEM/TEM imaging of dispersed graphene particles on Si wafer as defined by International standard ISO/TS 21356-1:2021 where the size of 2 dimensional graphene particles (LxW length X Width) were manually measured from images and presented by one dimension plus st. dev. This is defined and recommended method by International ISO standard to presenting lateral size of graphene particles from images which is maybe confusing for the reviewer.*

*The second method was using PSD/LD by measuring average particle size of graphene dispersed in solution where average particle size distribution (D50) was obtained by software based on measuring the angular variation of the light small angles relative to the laser beam and small particles scatter light at large angles considering the graphene particles are spherical.*

*Merits and limitations of both methods are explained in paper and known in literature which are reasonable in good agreement. In this paper we used PSD/LD data to generate graphs to show the influence of particle size on TGA parameters and we are confident that all presented results are correct.*

#### *Changes in revision 2:*

- 1. The graphs for PDS/LD measurements in 3 replicates for samples are presented in Figure S3 showing negligible differences in their graphs which average values were presented in Table 1 with st. dev as zero point (only two decimals were considered). The std. dev. values have already been included in our previous revision documents but additional decimal places have been included to address the response from reviewer and included in Table 1 (row 3)*
- 2. Calculation of the surface area of particles measured by SEM/TEM method is removed from the Table 1 to avoid confusion.*

|                                                                  | GO               |                  |                   | Graphene        |                  |                  |                  |                  | Graphite         |                  |                   |                   |
|------------------------------------------------------------------|------------------|------------------|-------------------|-----------------|------------------|------------------|------------------|------------------|------------------|------------------|-------------------|-------------------|
|                                                                  | GO1              | GO2              | GO3*              | Gr1             | Gr2              | Gr3              | Gr4              | Gr5*             | Gft1             | Gft2             | Gft3              | Gft4*             |
| Sieve fraction/ $\mu\text{m}$                                    | $\leq 25$        | 25-53            | un-sieved         | N.A.            |                  |                  |                  |                  | $\leq 25$        | 25-53            | 53-100            | 100-150           |
| Average lateral size, SEM $\pm$ stdev ( $\mu\text{m}$ )          | $23.5 \pm 10.6$  | $46.4 \pm 21.2$  | $73.4 \pm 40.4$   | $7.0 \pm 2.8$   | $15.9 \pm 3.7$   | $28.3 \pm 0.5$   | $49.4 \pm 6.0$   | $52.8 \pm 3.4$   | $11.3 \pm 2.1$   | $44.9 \pm 37.0$  | $130.6 \pm 13.7$  | $158.8 \pm 20.2$  |
| Average d(50) <sub>v</sub> from LD $\pm$ stdev ( $\mu\text{m}$ ) | $28.6 \pm 0.010$ | $45.7 \pm 0.077$ | $120.2 \pm 0.032$ | $7.6 \pm 0.028$ | $13.2 \pm 0.018$ | $36.8 \pm 0.043$ | $60.3 \pm 0.060$ | $73.4 \pm 0.100$ | $24.2 \pm 0.099$ | $60.0 \pm 0.028$ | $104.0 \pm 0.056$ | $148.8 \pm 0.006$ |
